# Supplementary material for: Impact of Plastic Pollution on Marine Biodiversity in Italy
Source: MDPI journal article supplement (doi:10.3390/w16040519), 2024-02-06
Supplement: s1 [file s1]

## Supplementary Data

**Table S1.** Plastic-wildlife interactions in Italy an according to digital media.

| Case number | Year | GSA | Type of interaction | Species                | Common name           | Conservation status | Health status | Environment |
|-------------|------|-----|---------------------|------------------------|-----------------------|---------------------|---------------|-------------|
| 1           | 2009 | 19  | Entanglement        | <i>Caretta caretta</i> | Loggerhead sea turtle | Vulnerable          | Alive         | Beach       |
| 2           | 2015 | 11  | Entanglement        | <i>Caretta caretta</i> | Loggerhead sea turtle | Vulnerable          | Alive         | Beach       |
| 3           | 2015 | 16  | Ingestion           | <i>Caretta caretta</i> | Loggerhead sea turtle | Vulnerable          | Alive         | Sea         |
| 4           | 2016 | 17  | Entanglement        | <i>Caretta caretta</i> | Loggerhead sea turtle | Vulnerable          | Alive         | Sea         |
| 5           | 2016 | 17  | Entanglement        | <i>Caretta caretta</i> | Loggerhead sea turtle | Vulnerable          | Alive         | Sea         |
| 6           | 2016 | 17  | Entanglement        | <i>Caretta caretta</i> | Loggerhead sea turtle | Vulnerable          | Alive         | Sea         |
| 7           | 2016 | 17  | Entanglement        | <i>Caretta caretta</i> | Loggerhead sea turtle | Vulnerable          | Alive         | Sea         |
| 8           | 2016 | 17  | Entanglement        | <i>Caretta caretta</i> | Loggerhead sea turtle | Vulnerable          | Alive         | Sea         |
| 9           | 2016 | 17  | Entanglement        | <i>Caretta caretta</i> | Loggerhead sea turtle | Vulnerable          | Alive         | Sea         |
| 10          | 2016 | 16  | Ingestion           | <i>Caretta caretta</i> | Loggerhead sea turtle | Vulnerable          | Alive         | Sea         |
| 11          | 2017 | 16  | Ingestion           | <i>Caretta caretta</i> | Loggerhead sea turtle | Vulnerable          | Alive         | Beach       |
| 12          | 2017 | 16  | Ingestion           | <i>Caretta caretta</i> | Loggerhead sea turtle | Vulnerable          | Alive         | Sea         |
| 13          | 2017 | 9   | Entanglement        | <i>Caretta caretta</i> | Loggerhead sea turtle | Vulnerable          | Alive         | Sea         |
| 14          | 2017 | 17  | Entanglement        | <i>Caretta caretta</i> | Loggerhead sea turtle | Vulnerable          | Alive         | Beach       |
| 15          | 2018 | 19  | Ingestion           | <i>Caretta caretta</i> | Loggerhead sea turtle | Vulnerable          | Dead          | Beach       |
| 16          | 2018 | 19  | Ingestion           | <i>Caretta caretta</i> | Loggerhead sea turtle | Vulnerable          | Alive         | Beach       |
| 17          | 2018 | 18  | Entanglement        | <i>Caretta caretta</i> | Loggerhead sea turtle | Vulnerable          | Alive         | Sea         |
| 18          | 2019 | 10  | Ingestion           | <i>Caretta caretta</i> | Loggerhead sea turtle | Vulnerable          | Dead          | Sea         |
| 19          | 2019 | 11  | Entanglement        | <i>Caretta caretta</i> | Loggerhead sea turtle | Vulnerable          | Dead          | Beach       |
| 20          | 2019 | 16  | Ingestion           | <i>Caretta caretta</i> | Loggerhead sea turtle | Vulnerable          | Dead          | Beach       |
| 21          | 2019 | 19  | Entanglement        | <i>Caretta caretta</i> | Loggerhead sea turtle | Vulnerable          | Dead          | Beach       |
| 22          | 2019 | 18  | Ingestion           | <i>Caretta caretta</i> | Loggerhead sea turtle | Vulnerable          | Dead          | Beach       |
| 23          | 2019 | 9   | Entanglement        | <i>Caretta caretta</i> | Loggerhead sea turtle | Vulnerable          | Dead          | Beach       |
| 24          | 2019 | 11  | Ingestion           | <i>Caretta caretta</i> | Loggerhead sea turtle | Vulnerable          | Alive         | Beach       |
| 25          | 2019 | 16  | Ingestion           | <i>Caretta caretta</i> | Loggerhead sea turtle | Vulnerable          | Alive         | Sea         |
| 26          | 2019 | 19  | Entanglement        | <i>Caretta caretta</i> | Loggerhead sea turtle | Vulnerable          | Alive         | Sea         |
| 27          | 2019 | 11  | Ingestion           | <i>Caretta caretta</i> | Loggerhead sea turtle | Vulnerable          | Alive         | Sea         |
| 28          | 2019 | 10  | Entanglement        | <i>Caretta caretta</i> | Loggerhead sea turtle | Vulnerable          | Alive         | Sea         |
| 29          | 2019 | 10  | Entanglement        | <i>Caretta caretta</i> | Loggerhead sea turtle | Vulnerable          | Alive         | Sea         |
| 30          | 2020 | 10  | Entanglement        | <i>Caretta caretta</i> | Loggerhead sea turtle | Vulnerable          | Alive         | Sea         |
| 31          | 2020 | 18  | Ingestion           | <i>Caretta caretta</i> | Loggerhead sea turtle | Vulnerable          | Alive         | Sea         |
| 32          | 2020 | 16  | Ingestion           | <i>Caretta caretta</i> | Loggerhead sea turtle | Vulnerable          | Alive         | Sea         |
| 33          | 2020 | 18  | Ingestion           | <i>Caretta caretta</i> | Loggerhead sea turtle | Vulnerable          | Alive         | Sea         |

|    |      |    |              |                        |                       |            |       |       |
|----|------|----|--------------|------------------------|-----------------------|------------|-------|-------|
| 34 | 2020 | 10 | Ingestion    | <i>Caretta caretta</i> | Loggerhead sea turtle | Vulnerable | Dead  | Beach |
| 35 | 2020 | 16 | Ingestion    | <i>Caretta caretta</i> | Loggerhead sea turtle | Vulnerable | Alive | Sea   |
| 36 | 2020 | 11 | Ingestion    | <i>Caretta caretta</i> | Loggerhead sea turtle | Vulnerable | Alive | Sea   |
| 37 | 2020 | 11 | Entanglement | <i>Caretta caretta</i> | Loggerhead sea turtle | Vulnerable | Alive | Sea   |
| 38 | 2020 | 11 | Ingestion    | <i>Caretta caretta</i> | Loggerhead sea turtle | Vulnerable | Alive | Sea   |
| 39 | 2020 | 18 | Entanglement | <i>Caretta caretta</i> | Loggerhead sea turtle | Vulnerable | Alive | Sea   |
| 40 | 2020 | 18 | Entanglement | <i>Caretta caretta</i> | Loggerhead sea turtle | Vulnerable | Alive | Sea   |
| 41 | 2021 | 9  | Ingestion    | <i>Caretta caretta</i> | Loggerhead sea turtle | Vulnerable | Alive | Sea   |
| 42 | 2021 | 11 | Entanglement | <i>Caretta caretta</i> | Loggerhead sea turtle | Vulnerable | Alive | Sea   |
| 43 | 2021 | 11 | Entanglement | <i>Caretta caretta</i> | Loggerhead sea turtle | Vulnerable | Alive | Sea   |
| 44 | 2021 | 11 | Entanglement | <i>Caretta caretta</i> | Loggerhead sea turtle | Vulnerable | Alive | Sea   |
| 45 | 2021 | 11 | Entanglement | <i>Caretta caretta</i> | Loggerhead sea turtle | Vulnerable | Alive | Sea   |
| 46 | 2021 | 11 | Entanglement | <i>Caretta caretta</i> | Loggerhead sea turtle | Vulnerable | Alive | Sea   |
| 47 | 2021 | 10 | Entanglement | <i>Caretta caretta</i> | Loggerhead sea turtle | Vulnerable | Dead  | Beach |
| 48 | 2021 | 9  | Entanglement | <i>Caretta caretta</i> | Loggerhead sea turtle | Vulnerable | Dead  | Beach |
| 49 | 2021 | 10 | Entanglement | <i>Caretta caretta</i> | Loggerhead sea turtle | Vulnerable | Dead  | Sea   |
| 50 | 2021 | 9  | Ingestion    | <i>Caretta caretta</i> | Loggerhead sea turtle | Vulnerable | Alive | Sea   |
| 51 | 2021 | 10 | Ingestion    | <i>Caretta caretta</i> | Loggerhead sea turtle | Vulnerable | Alive | Sea   |
| 52 | 2021 | 16 | Ingestion    | <i>Caretta caretta</i> | Loggerhead sea turtle | Vulnerable | Dead  | Sea   |
| 53 | 2021 | 11 | Ingestion    | <i>Caretta caretta</i> | Loggerhead sea turtle | Vulnerable | Alive | Sea   |
| 54 | 2021 | 11 | Ingestion    | <i>Caretta caretta</i> | Loggerhead sea turtle | Vulnerable | Alive | Sea   |
| 55 | 2021 | 11 | Ingestion    | <i>Caretta caretta</i> | Loggerhead sea turtle | Vulnerable | Alive | Sea   |
| 56 | 2021 | 17 | Entanglement | <i>Caretta caretta</i> | Loggerhead sea turtle | Vulnerable | Alive | Beach |
| 57 | 2021 | 10 | Entanglement | <i>Caretta caretta</i> | Loggerhead sea turtle | Vulnerable | Alive | Sea   |
| 58 | 2021 | 10 | Ingestion    | <i>Caretta caretta</i> | Loggerhead sea turtle | Vulnerable | Alive | Sea   |
| 59 | 2021 | 10 | Entanglement | <i>Caretta caretta</i> | Loggerhead sea turtle | Vulnerable | Alive | Sea   |
| 60 | 2021 | 10 | Entanglement | <i>Caretta caretta</i> | Loggerhead sea turtle | Vulnerable | Alive | Sea   |
| 61 | 2021 | 10 | Entanglement | <i>Caretta caretta</i> | Loggerhead sea turtle | Vulnerable | Alive | Sea   |
| 62 | 2021 | 10 | Entanglement | <i>Caretta caretta</i> | Loggerhead sea turtle | Vulnerable | Alive | Sea   |
| 63 | 2021 | 10 | Ingestion    | <i>Caretta caretta</i> | Loggerhead sea turtle | Vulnerable | Dead  | Beach |
| 64 | 2021 | 9  | Entanglement | <i>Caretta caretta</i> | Loggerhead sea turtle | Vulnerable | Alive | Sea   |
| 65 | 2022 | 9  | Entanglement | <i>Caretta caretta</i> | Loggerhead sea turtle | Vulnerable | Alive | Sea   |
| 66 | 2022 | 9  | Entanglement | <i>Caretta caretta</i> | Loggerhead sea turtle | Vulnerable | Alive | Sea   |
| 67 | 2022 | 9  | Entanglement | <i>Caretta caretta</i> | Loggerhead sea turtle | Vulnerable | Alive | Sea   |
| 68 | 2022 | 10 | Entanglement | <i>Caretta caretta</i> | Loggerhead sea turtle | Vulnerable | Alive | Sea   |
| 69 | 2022 | 10 | Entanglement | <i>Caretta caretta</i> | Loggerhead sea turtle | Vulnerable | Dead  | Beach |
| 70 | 2022 | 10 | Ingestion    | <i>Caretta caretta</i> | Loggerhead sea turtle | Vulnerable | Dead  | Beach |
| 71 | 2022 | 10 | Ingestion    | <i>Caretta caretta</i> | Loggerhead sea turtle | Vulnerable | Alive | Beach |
| 72 | 2022 | 10 | Ingestion    | <i>Caretta caretta</i> | Loggerhead sea turtle | Vulnerable | Alive | Sea   |

|     |      |    |                        |                             |                        |               |       |       |
|-----|------|----|------------------------|-----------------------------|------------------------|---------------|-------|-------|
| 73  | 2022 | 19 | Entanglement           | <i>Caretta caretta</i>      | Loggerhead sea turtle  | Vulnerable    | Alive | Sea   |
| 74  | 2022 | 19 | Entanglement           | <i>Caretta caretta</i>      | Loggerhead sea turtle  | Vulnerable    | Alive | Sea   |
| 75  | 2023 | 10 | Entanglement           | <i>Caretta caretta</i>      | Loggerhead sea turtle  | Vulnerable    | Alive | Sea   |
| 76  | 2023 | 19 | Entanglement           | <i>Caretta caretta</i>      | Loggerhead sea turtle  | Vulnerable    | Alive | Beach |
| 77  | 2023 | 19 | Ingestion              | <i>Caretta caretta</i>      | Loggerhead sea turtle  | Vulnerable    | Alive | Beach |
| 78  | 2023 | 10 | Entanglement           | <i>Caretta caretta</i>      | Loggerhead sea turtle  | Vulnerable    | Alive | Sea   |
| 79  | 2023 | 10 | Ingestion              | <i>Caretta caretta</i>      | Loggerhead sea turtle  | Vulnerable    | Alive | Sea   |
| 80  | 2023 | 10 | Ingestion              | <i>Caretta caretta</i>      | Loggerhead sea turtle  | Vulnerable    | Dead  | Sea   |
| 81  | 2023 | 10 | Ingestion              | <i>Caretta caretta</i>      | Loggerhead sea turtle  | Vulnerable    | Alive | Sea   |
| 82  | 2023 | 16 | Ingestion              | <i>Caretta caretta</i>      | Loggerhead sea turtle  | Vulnerable    | Alive | Sea   |
| 83  | 2023 | 19 | Ingestion              | <i>Caretta caretta</i>      | Loggerhead sea turtle  | Vulnerable    | Alive | Sea   |
| 84  | 2023 | 16 | Entanglement           | <i>Caretta caretta</i>      | Loggerhead sea turtle  | Vulnerable    | Alive | Sea   |
| 85  | 2023 | 10 | Entanglement           | <i>Caretta caretta</i>      | Loggerhead sea turtle  | Vulnerable    | Alive | Beach |
| 86  | 2023 | 17 | Entanglement           | <i>Caretta caretta</i>      | Loggerhead sea turtle  | Vulnerable    | Alive | Sea   |
| 87  | 2023 | 10 | Entanglement           | <i>Caretta caretta</i>      | Loggerhead sea turtle  | Vulnerable    | Alive | Sea   |
| 88  | 2023 | 18 | Entanglement           | <i>Caretta caretta</i>      | Loggerhead sea turtle  | Vulnerable    | Dead  | Sea   |
| 89  | 2023 | 10 | Ingestion              | <i>Caretta caretta</i>      | Loggerhead sea turtle  | Vulnerable    | Dead  | Sea   |
| 90  | 2023 | 10 | Ingestion              | <i>Caretta caretta</i>      | Loggerhead sea turtle  | Vulnerable    | Alive | Sea   |
| 91  | 2023 | 10 | Ingestion              | <i>Caretta caretta</i>      | Loggerhead sea turtle  | Vulnerable    | Alive | Sea   |
| 92  | 2023 | 10 | Ingestion              | <i>Caretta caretta</i>      | Loggerhead sea turtle  | Vulnerable    | Alive | Sea   |
| 93  | 2023 | 10 | Entanglement           | <i>Caretta caretta</i>      | Loggerhead sea turtle  | Vulnerable    | Alive | Sea   |
| 94  | 2023 | 10 | Ingestion/Entanglement | <i>Caretta caretta</i>      | Loggerhead sea turtle  | Vulnerable    | Alive | Sea   |
| 95  | 2023 | 18 | Entanglement           | <i>Cetorhinus maximus</i>   | Basking shark          | Endangered    | Dead  | Sea   |
| 96  | 2015 | 19 | Entanglement           | <i>Chelonia mydas</i>       | Green turtle           | Endangered    | Alive | Sea   |
| 97  | 2016 | 16 | Ingestion              | <i>Chelonia mydas</i>       | Green turtle           | Endangered    | Alive | Sea   |
| 98  | 2019 | 10 | Entanglement           | <i>Dasyatis pastinaca</i>   | Common stingray        | Vulnerable    | Alive | Sea   |
| 99  | 2020 | 10 | Entanglement           | <i>Dasyatis pastinaca</i>   | Common stingray        | Vulnerable    | Alive | Sea   |
| 100 | 2020 | 18 | Entanglement           | <i>Tursiops truncatus</i>   | Bottlenose Dolphin     | Least concern | Dead  | Beach |
| 101 | 2023 | 17 | Ingestion              | <i>Tursiops truncatus</i>   | Bottlenose Dolphin     | Least concern | Dead  | Beach |
| 102 | 2023 | 11 | Entanglement           | <i>Tursiops truncatus</i>   | Bottlenose Dolphin     | Least concern | Alive | Sea   |
| 103 | 2011 | 11 | Entanglement           | <i>Dermochelys coriacea</i> | Loggerhead sea turtle  | Vulnerable    | Alive | Sea   |
| 104 | 2014 | 19 | Entanglement           | <i>Dermochelys coriacea</i> | Leatherback sea turtle | Vulnerable    | Alive | Sea   |
| 105 | 2016 | 16 | Ingestion              | <i>Dermochelys coriacea</i> | Leatherback sea turtle | Vulnerable    | Dead  | Sea   |
| 106 | 2023 | 9  | Entanglement           | <i>Homarus gammarus</i>     | European lobster       | Least concern | Alive | Sea   |
| 107 | 2015 | 10 | Entanglement           | <i>Larus michahellis</i>    | Yellow-legged bull     | Least concern | Alive | Beach |
| 108 | 2019 | 9  | Entanglement           | <i>Larus michahellis</i>    | Yellow-legged bull     | Least concern | Alive | Beach |
| 109 | 2019 | 9  | Entanglement           | <i>Larus michahellis</i>    | Yellow-legged bull     | Least concern | Alive | Beach |
| 110 | 2023 | 16 | Entanglement           | <i>Larus michahellis</i>    | Yellow-legged bull     | Least concern | Alive | Beach |
| 111 | 2019 | 10 | Entanglement           | <i>Oblada melanura</i>      | Saddled seabream       | Least concern | Alive | Sea   |

---

|     |      |    |              |                               |                     |                 |         |       |
|-----|------|----|--------------|-------------------------------|---------------------|-----------------|---------|-------|
| 112 | 2021 | 9  | Entanglement | <i>Octopus vulgaris</i>       | Common octopus      | Least concern   | Alive   | Sea   |
| 113 | 2022 | 11 | Entanglement | <i>Phoenicopterus roseus</i>  | Greater flamingo    | Least concern   | Alive   | Sea   |
| 114 | 2019 | 9  | Entanglement | <i>Physeter macrocephalus</i> | Sperm whale         | Vulnerable      | Dead    | Sea   |
| 115 | 2019 | 9  | Entanglement | <i>Physeter macrocephalus</i> | Sperm whale         | Vulnerable      | Dead    | Sea   |
| 116 | 2019 | 10 | Ingestion    | <i>Physeter macrocephalus</i> | Sperm whale         | Vulnerable      | Dead    | Beach |
| 117 | 2019 | 11 | Ingestion    | <i>Physeter macrocephalus</i> | Sperm whale         | Vulnerable      | Dead    | Beach |
| 118 | 2019 | 10 | Ingestion    | <i>Physeter macrocephalus</i> | Sperm whale         | Vulnerable      | Dead    | Beach |
| 119 | 2019 | 10 | Ingestion    | <i>Physeter macrocephalus</i> | Sperm whale         | Vulnerable      | Dead    | Beach |
| 120 | 2020 | 10 | Entanglement | <i>Physeter macrocephalus</i> | Sperm whale         | Vulnerable      | Unknown | Beach |
| 121 | 2018 | 18 | Entanglement | <i>Prionace glauca</i>        | Blu shark           | Near threatened | Dead    | Sea   |
| 122 | 2021 | 17 | Entanglement | <i>Prionace glauca</i>        | Blu shark           | Near threatened | unknown | Sea   |
| 123 | 2021 | 10 | Entanglement | <i>Puffinus yelkouan</i>      | Yelkouan shearwater | Vulnerable      | Alive   | Sea   |
| 124 | 2023 | 10 | Entanglement | <i>Serranus scriba</i>        | Painted comber      | Least concern   | Alive   | Sea   |
| 125 | 2023 | 10 | Entanglement | <i>Serranus scriba</i>        | Painted comber      | Least concern   | Alive   | Sea   |
| 126 | 2012 | 18 | Ingestion    | <i>Stenella coeruleoalba</i>  | Striped dolphin     | Least concern   | Dead    | Beach |
| 127 | 2021 | 17 | Entanglement | <i>Stenella coeruleoalba</i>  | Striped dolphin     | Least concern   | Dead    | Beach |

---
